# Supplementary material for: Enhanced photovoltaic output of bifacial perovskite solar cells via tailoring photoelectric balance in rear window layers with 1T-WS2 nanosheet engineering
Source: Royal Society of Chemistry journal article supplement (doi:10.1039/d2qm00366j), 2022-01-01
Supplement: d2qm00366j1.pdf [file d2qm00366j1.pdf]

## **Enhanced photovoltaic output of bifacial perovskite solar cells via tailoring photoelectric balance in rear window layers with 1T-WS<sub>2</sub> nanosheets engineering**

Lin Fan,<sup>ab</sup> Wanhong Lü,<sup>a</sup> Wanting Hu,<sup>a</sup> Donglai Han,<sup>c</sup> Shuo Yang,<sup>d</sup> Dandan Wang,<sup>e</sup> Zhihong Mai,<sup>e</sup> Fengyou Wang,<sup>ab</sup> Huilian Liu,<sup>ab</sup> Jinghai Yang,<sup>\*\*ab</sup> and Lili Yang<sup>\*ab</sup>

<sup>a</sup> *Key Laboratory of Functional Materials Physics and Chemistry of the Ministry of Education, Jilin Normal University, Changchun 130103, China*

<sup>b</sup> *National Demonstration Center for Experimental Physics Education, Jilin Normal University, Siping 136000, China*

<sup>c</sup> *School of Materials Science and Engineering, Changchun University of Science and Technology, Changchun 130022, China*

<sup>d</sup> *College of Science, Changchun University, Changchun 130022, China*

<sup>e</sup> *Hubei JiuFengShan Laboratory, Future Science and Technology City, Wuhan, Hubei, 420000, China*

*E-mail addresses:* [llyang1980@126.com](mailto:llyang1980@126.com) (Lili Yang), [jhyang1@jlnu.edu.cn](mailto:jhyang1@jlnu.edu.cn) (Jinghai Yang).

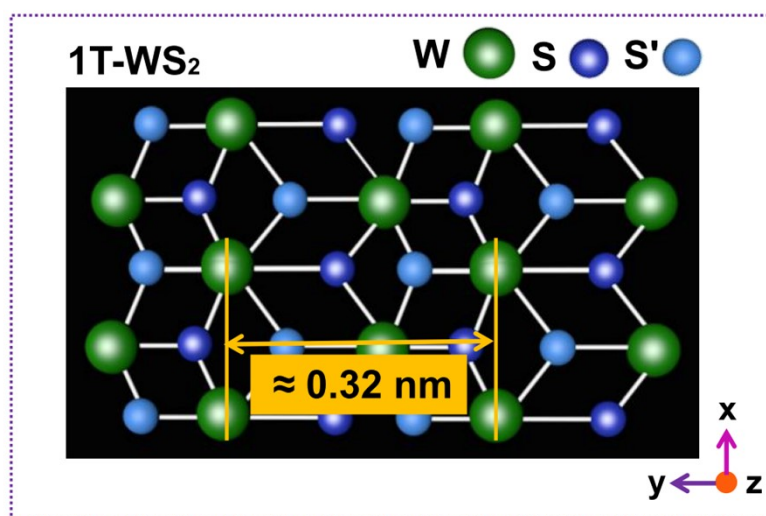

**Fig. S1** Top-view molecule structures of 1T-WS<sub>2</sub>. W atoms are in green and S atoms are in purple and blue for top and bottom layers, respectively.

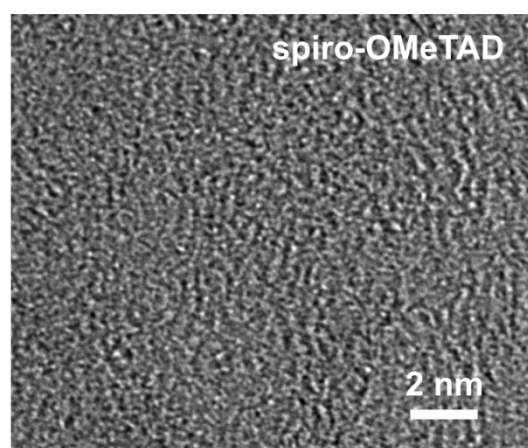

**Fig. S2** HRTEM image of spiro-OMeTAD film.

**Fig. S3** (a) Raman spectra of SP and SP + W films. (b) Surface SEM image and elemental mappings (W and S) of SP + W film.

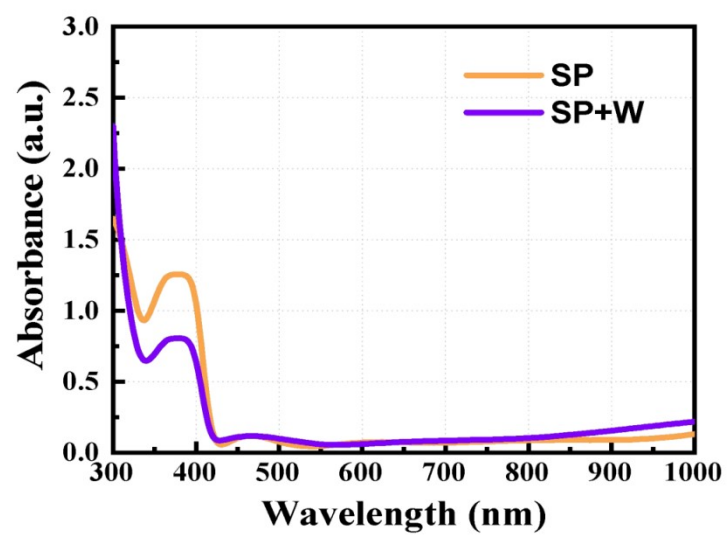

**Fig. S4** UV-vis absorption spectra of SP and SP + W films.

**Fig. S5** (a) TRPL plots and fitting curves of Glass/PVK/SP and Glass/PVK/SP + W substrates. (b) Nyquist plots of solar cells based on SP and SP + W HTLs, obtained with a bias of 0.8 V in dark. Inset: equivalent circuit used to fit the data.

**Fig. S6** (a) OCVD curves and (b) dark-current measurements of the corresponding devices.

**Fig. S7** Optimization of the optical and electrical properties of different SP + W films deposited on ITO-glass substrates: (a) transmittance, (b) UV-vis absorption, and (c) conductivity.

**Fig. S8** (a)  $J$ - $V$  curves of the best-performing SP-based b-PSC illuminated on different sides. (b) Corresponding EQE spectra and integrated  $J_{\text{SC}}$  .

**Fig. S9** Steady-state current densities measured at the voltage of the maximum power point for (a) SP and (b) SP + W b-PSCs.

**Table S1** Hall measurement results of SP and SP + W films

| Samples | Conductivity | Resistivity | Hall Mobility | Thickness |
|---------|--------------|-------------|---------------|-----------|
|---------|--------------|-------------|---------------|-----------|

|               | (S/cm)                | ( $\Omega \cdot \text{cm}$ ) | ( $\text{cm}^2/\text{V} \cdot \text{s}$ ) | (nm)     |
|---------------|-----------------------|------------------------------|-------------------------------------------|----------|
| <b>SP</b>     | $5.00 \times 10^{-7}$ | $2.00 \times 10^6$           | $3.57 \times 10^{-3}$                     | ~ 230 nm |
| <b>SP + W</b> | $6.57 \times 10^{-5}$ | $1.50 \times 10^4$           | $6.04 \times 10^{-3}$                     | ~ 150 nm |

**Table S2** Fitting parameters from EIS

| Samples | $R_s (\Omega)$ | $R_{tr} (\Omega)$ | $R_{rec} (\Omega)$ | $C_{tr} (F)$         | $C_{rec} (F)$        |
|---------|----------------|-------------------|--------------------|----------------------|----------------------|
| SP      | 34.21          | 24.66             | 383.3              | $7.3 \times 10^{-9}$ | $5.6 \times 10^{-9}$ |
| SP + W  | 27.86          | 18.81             | 468.3              | $7.1 \times 10^{-9}$ | $6.4 \times 10^{-9}$ |

## Experimental section

***Materials and reagents:***

Etched indium-doped tin oxide (ITO,  $2 \times 2 \text{ cm}^2$ ) conducting glasses were purchased from Yingkou Optimum Trade Co., Ltd., whereas tin oxide colloidal dispersion ( $\text{SnO}_2$  15% in  $\text{H}_2\text{O}$  colloidal dispersion), dimethyl sulfoxide (DMSO,  $\geq 99.8\%$ ), N,N-dimethylformamide (DMF,  $\geq 99.8\%$ ), and methylammonium iodide ( $\text{CH}_3\text{NH}_3\text{I}$ , MAI,  $\geq 99.8\%$ ) were purchased from Alfa Aesar. Lead (II) iodide ( $\text{PbI}_2$ ,  $\geq 99.999\%$ ) and chlorobenzene (CB,  $\geq 99.5\%$ ) were obtained from Sigma-Aldrich and Aladdin Reagent, respectively. Tungsten disulfide nanosheet powder ( $\text{WS}_2$ , average lateral size:  $\sim 100 \text{ nm}$ ) was purchased from Nanjing XFNANO Materials Co., Ltd. The 2,2',7,7'-tetrakis [N,N-di(4-meth-oxyphenyl)amino]-9,9'-spirobifluorene (spiro-OMeTAD,  $\geq 99.0\%$ ), sulfonyl imide (Li-TFSI,  $\geq 99\%$ ), acetonitrile ( $\geq 99.9\%$ ), and 4-tertbutylpyridine (TBP,  $\geq 99\%$ ) were supplied by Yingkou Optimum Trade Co., Ltd. The purity of the silver (Ag) used for thermally evaporated electrode was 99.99%. All chemicals and reagents were directly used without further purification.

***Materials and devices characterization:***

Transmission electron microscopy (TEM) images were taken using a JEOL-2010 TEM operating at a 200 kV accelerating voltage. The surface and cross-sectional morphologies of samples were measured using a field-emission scanning electron microscopy (SEM, JEOL, JSM-7800F). The material states of samples were characterized by means of Raman spectroscopy (Nanofinder 30, Tokyo Instruments Inc.), using laser excitation with a 514 nm wavelength. The optical properties, including transmission and absorption, were recorded on an UV-vis spectrophotometer (SHTMADZU, UV-3600plus). The relevant electrical parameters of different films were analyzed by a four-point probe system with a current source-

meter (RS8, BEGA Technologies). X-ray photoelectron spectroscopy (XPS) and ultraviolet photoelectron spectroscopy (UPS) were performed using an XPS/UPS system (ThermoFisher, Excalab 250 xi). The chemical composition and state analysis of samples were measured by XPS, and the energy band structure was evaluated by UPS with the He I (21.22 eV) emission line employed for excitation. The surface potentials of films were measured with Kelvin probe force microscope (KPFM, Park Systems NX20, Korea). The time-resolved photoluminescence (TRPL) spectrum was measured by a Fluorolog-3-TCSPC spectrometer (Edinburgh Instruments, FLS1000, UK). The electrochemical impedance spectroscopy (EIS) of solar cells was performed using an electrochemical workstation (CHI660C) at a voltage bias of 0.8 V in dark. The photocurrent density-voltage ( $J-V$ ) curves of solar cells with different incident light directions were acquired using a solar simulator (Newport Oriel Solar 3A Class AAA) equipped with a 150-W xenon lamp under AM 1.5G (100 mW/cm<sup>2</sup>) simulated sunlight. Light intensity was calibrated using a standard KG3-filtered silicon reference cell certified by the National Renewable Energy Laboratory. All devices were reverse scanned (from 1.2 V to – 0.2 V) at a scan rate of 130 mV/s, and the active area was delimited using the metal mask. The spectral response of devices was taken by an external quantum efficiency (EQE) measurement system (Newport, IQE 200<sup>TM</sup>), equipped with a monochromator, a lock-in amplifier, a Xe lamp, and a current–voltage amplifier.
